# Supplementary material for: Impact of Perineural Invasion and Preexisting Type 2 Diabetes on Patients with Esophageal Squamous Cell Carcinoma Receiving Neoadjuvant Chemoradiotherapy
Source: MDPI journal article supplement (doi:10.3390/cancers15041122), 2023-02-09
Supplement: s1 [file s1]

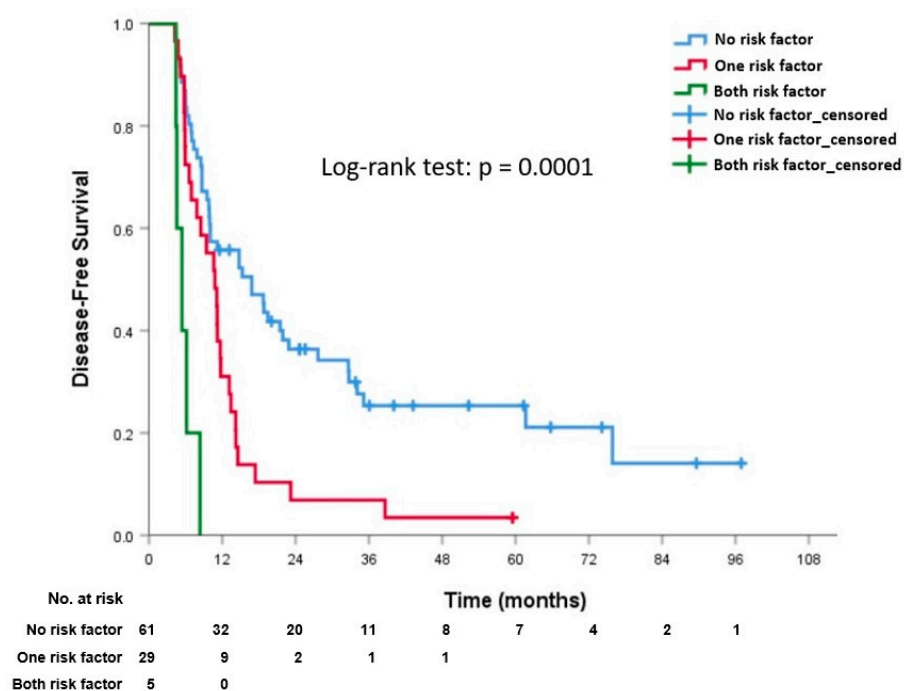

**Supplementary Figure S1.** Kaplan–Meier curve of disease-free survival for comparison among patients with no risk factors, one risk factor, and both risk factors in the non-pCR patient subgroup. Abbreviation: pCR: pathological complete response.

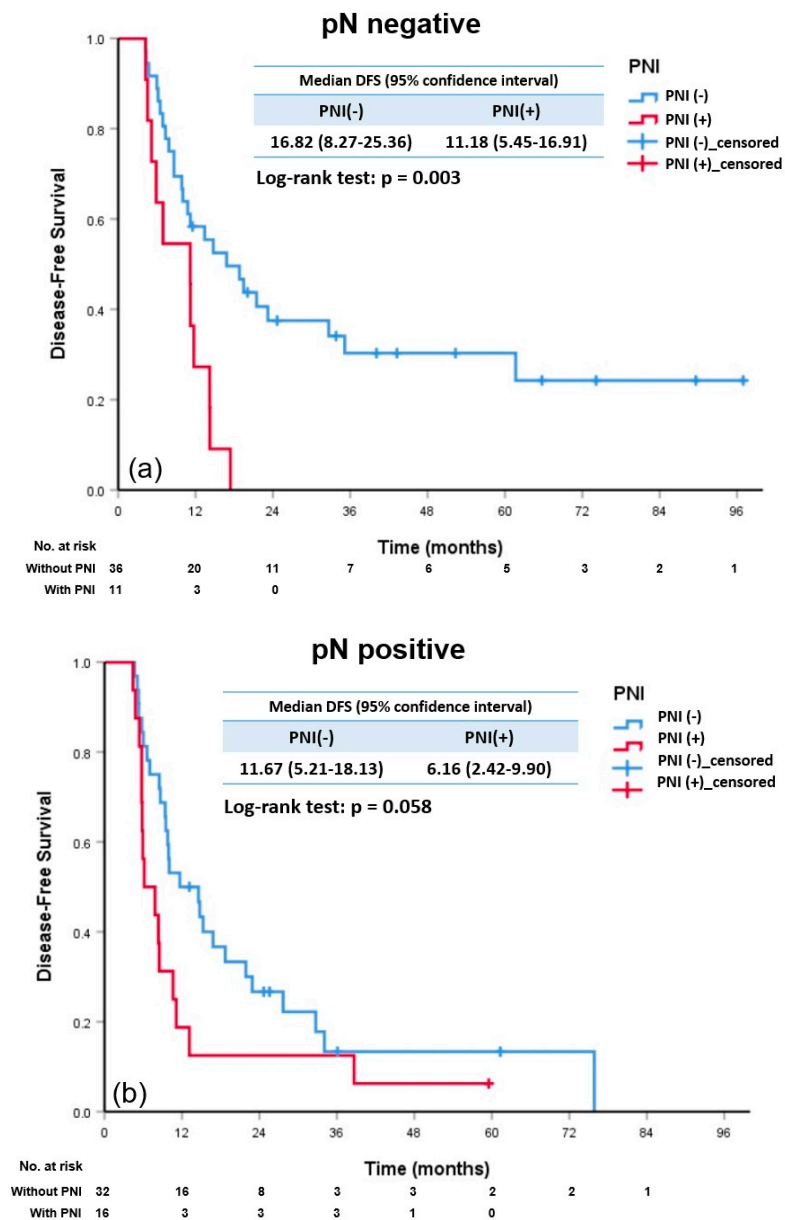

**Supplementary Figure S2.** Kaplan–Meier curve of DFS for comparison between the presence and absence of PNI in the subgroup of (a) node-negative patients and (b) node-positive patients.

Abbreviations: DFS: disease-free survival; PNI: perineural invasion; pN: pathological lymph node
